# Supplementary material
Source: publisher figshare collection journal article supplement (https://gsapubs.figshare.com/ndownloader/files/22412034)
Supplement: Supplementary file 1 [file 22412034]

Archive with 4 entries (4 files):
- Sup 1. Hanna Basin Correlations.pdf
- Sup 2a. Zircon Analysis.pdf
- Sup 2b. HB detrital Zr Data.xlsx
- Sup 3. carbon isotope data.xlsx
