# Supplementary material
Source: publisher figshare collection journal article supplement (https://gsapubs.figshare.com/ndownloader/files/22412034)
Supplement: Supplementary file 1 [file 22412034 › Sup 1. Hanna Basin Correlations.pdf]

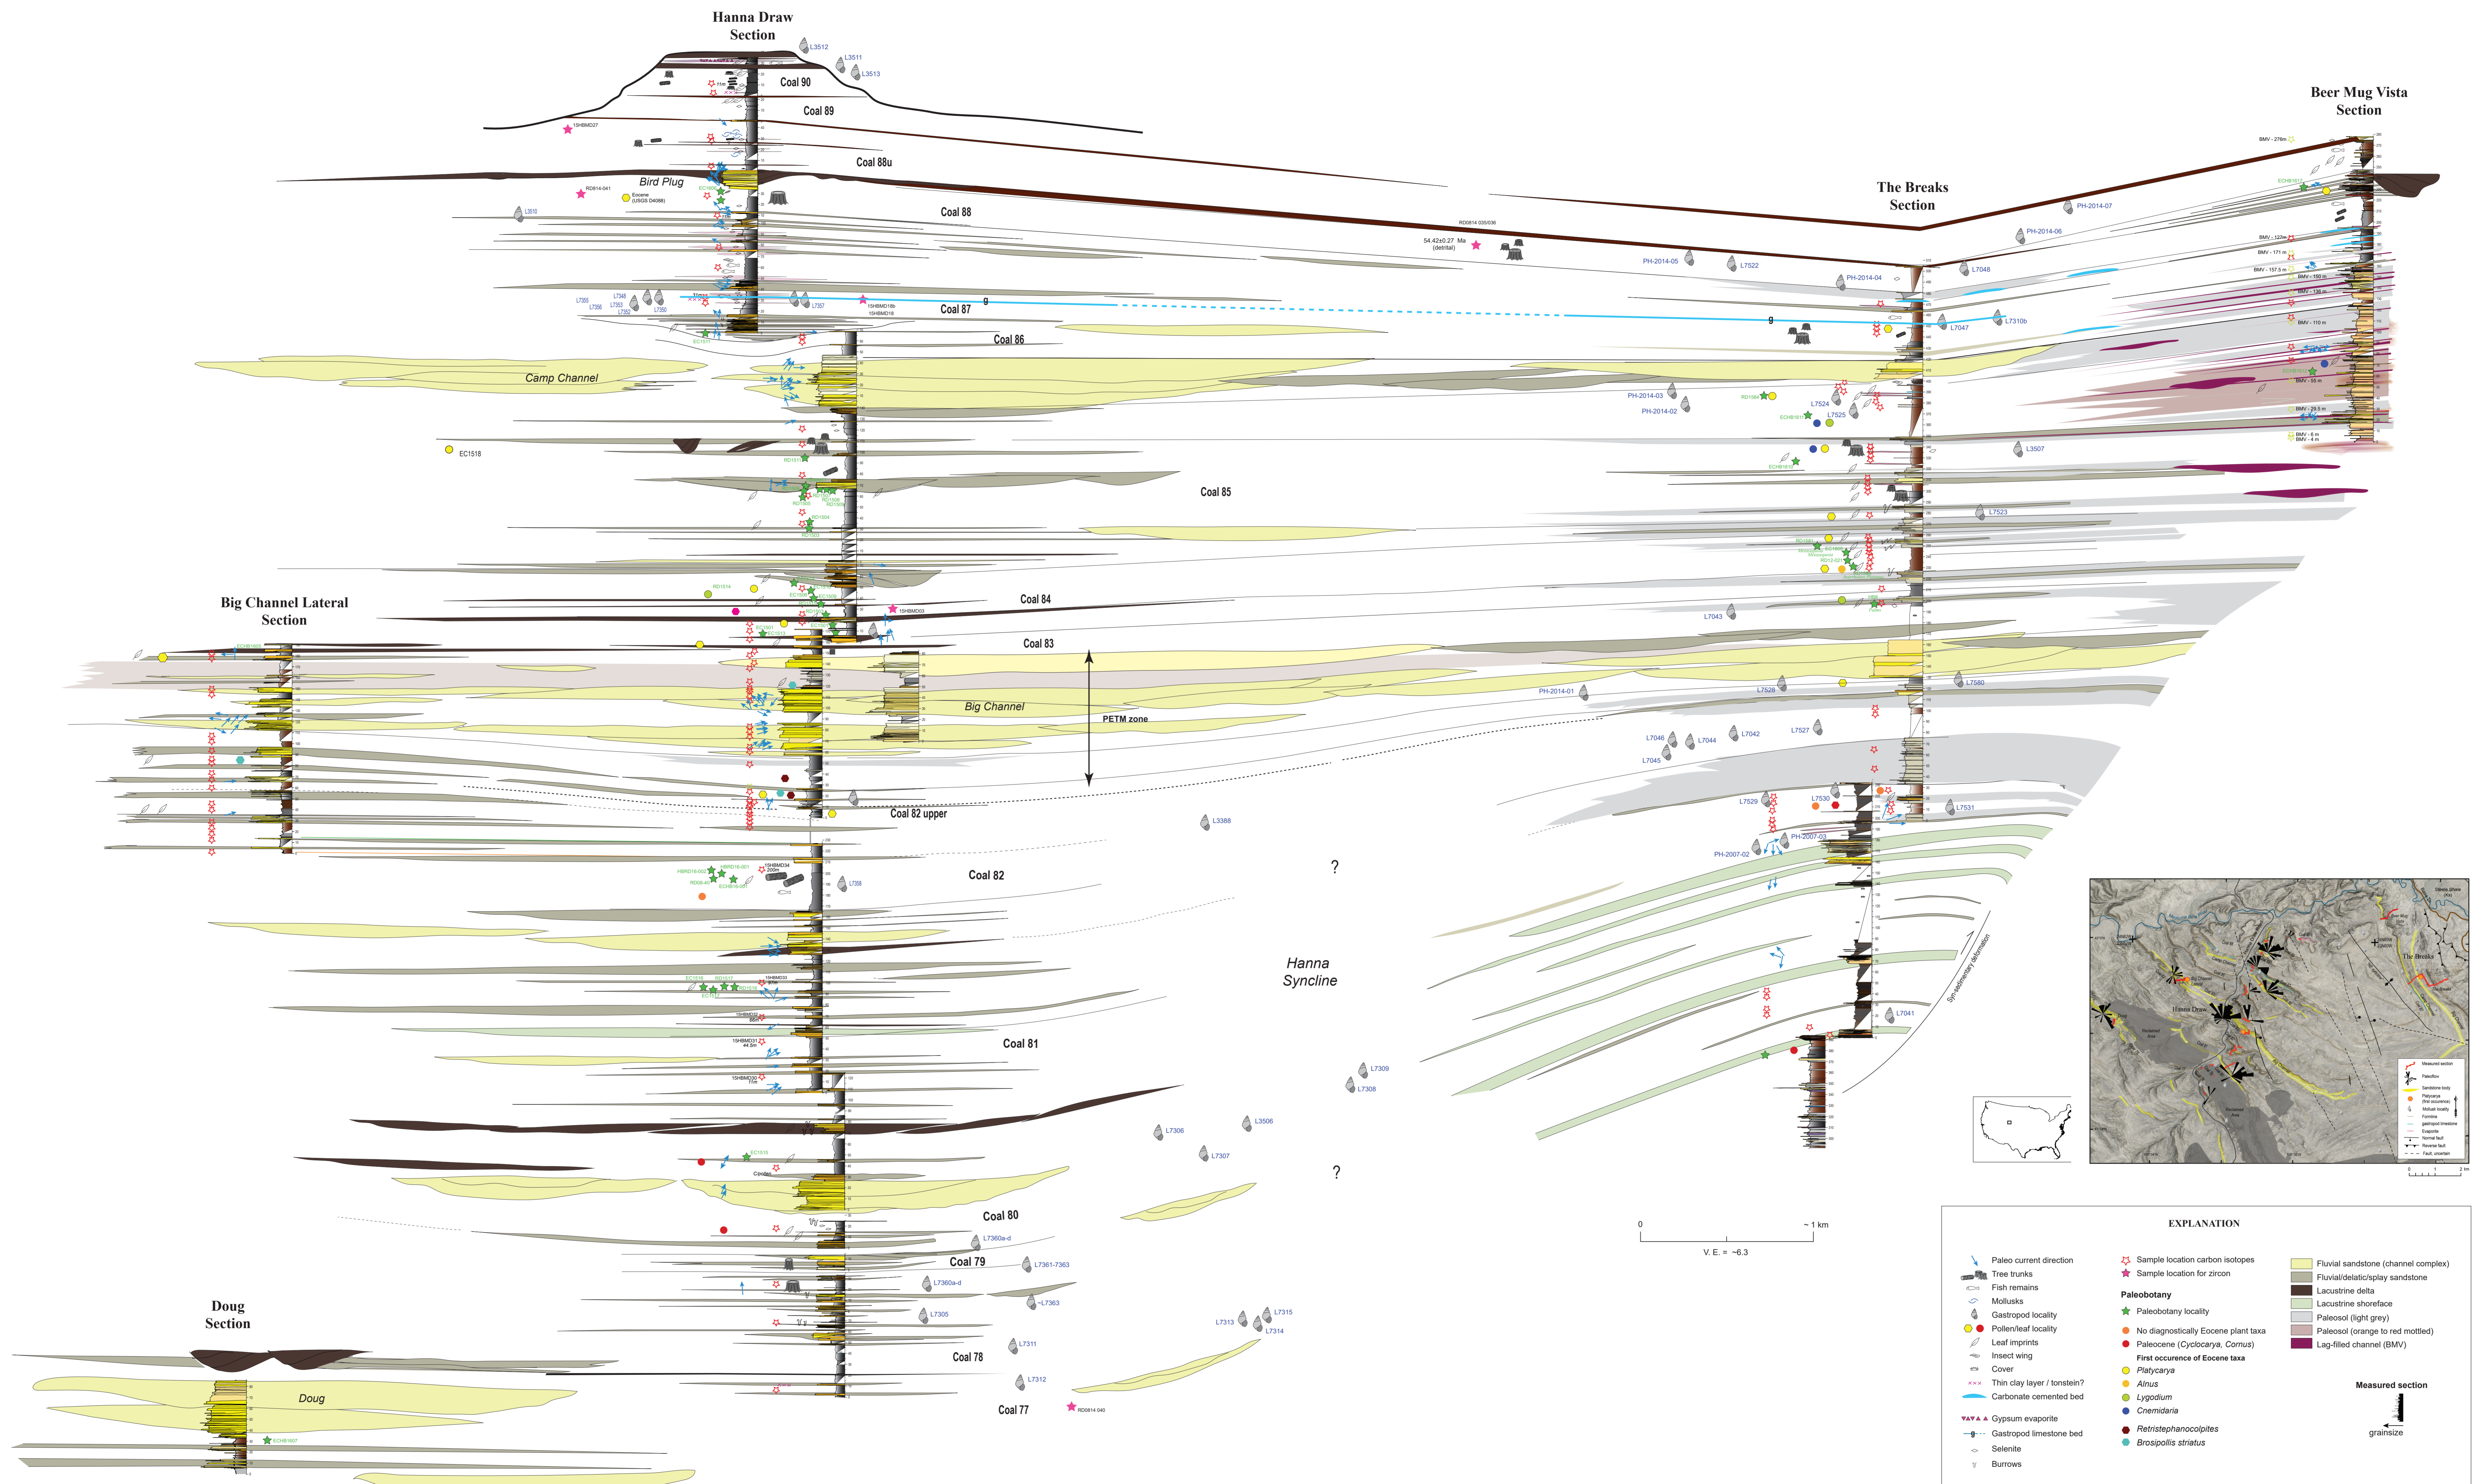

## Supplement 1: Stratigraphic Framework and sample locations for the Hanna Formation between Coal 76 and 90, Hanna Basin, Carbon County, Wyoming

A new stratigraphic framework and constraints for the position of the Paleocene–Eocene boundary in the rapidly subsiding Hanna Basin, Wyoming

By Marieke Dechesne, Ellen D. Currano, Regan E. Dunn, Pennilyn Higgins, Joseph H.Hartman, Kevin R. Chamberlain, and Christopher S. Holm-Denoma
