# Supplementary material
Source: publisher figshare collection journal article supplement (https://gsapubs.figshare.com/ndownloader/files/22412034)
Supplement: Supplementary file 1 [file 22412034 › Sup 2b. HB detrital Zr Data.xlsx]

## Sheet: Data
	Isotopic Ratios										Apparent Isotopic Dates (Ma)						Concentration Data (approximate)				Data Interpretations
Analysis	207Pb /235U	2-sig abs (propagated)*	206Pb /238U	2-sig abs (propagated)*	Error Correlation	238U/ 206Pb	2-sig abs (propagated)*	207Pb/ 206Pb	2-sig abs (propagated)*	Error Correlation	Age 206Pb /238U	2-sig (abs)^	Age 207Pb /235U	2-sig (abs)^	Age 207Pb /206Pb	2-sig (abs)^	U (ppm)	Th (ppm)	Pb (ppm)	U/Th	Percent Discordant (6/8 vs 7/5)	Percent Discordant (6/8 vs 7/6)	Preferred Age	2-sig (abs)^
SAMPLE HB-03
HB-03-02	1.23	0.41	0.0952	0.0092	0.99363	10.5042	1.01511	0.0934	0.0017	-0.67885	585	54	806	77	1495	38	1330	850	21.9	1.392	27.4194	60.8696	1495	38
HB-03-10	4.477	0.24	0.3116	0.0083	0.83904	3.20924	0.0854837	0.1038	0.0013	0.42326	1748	40	1726	15	1693	25	338	112.6	19.06	2.79	-1.27462	-3.24867	1693	25
HB-03-11	4.385	0.16	0.306	0.007	0.87986	3.26797	0.0747576	0.10389	0.0011	0.72901	1721	34	1709.3	11	1694	21	426	113.4	19.3	3.478	-0.684491	-1.59386	1694	21
HB-03-08	3.94	0.58	0.274	0.013	0.96555	3.64963	0.173158	0.10412	0.0012	-0.21464	1560	65	1620	43	1698	23	479	262	32.2	1.82	3.7037	8.12721	1698	23
HB-03-09	4.389	0.19	0.3025	0.0077	0.84428	3.30579	0.0841473	0.1055	0.0013	0.78846	1704	37	1710	13	1723	25	390	163	26.6	2.239	0.350877	1.10273	1723	25
HB-03-01	3.67	0.7	0.252	0.015	0.98381	3.96825	0.236206	0.1058	0.0012	-0.52211	1446	74	1559	56	1728	23	471	164.6	21	2.737	7.24824	16.3194	1728	23
HB-03-16	4.457	0.26	0.306	0.0086	0.87117	3.26797	0.091845	0.1061	0.0011	0.56359	1721	42	1722	17	1737	23	962	309	51.9	2.816	0.058072	0.921128	1737	23
HB-03-06	4.65	0.25	0.3154	0.009	0.72519	3.17058	0.090473	0.1066	0.0016	0.40058	1767	43	1762	17	1740	31	319	107.2	18.02	2.805	-0.283768	-1.55172	1740	31
HB-03-17	4.414	0.24	0.3014	0.0073	0.81182	3.31785	0.0803593	0.1071	0.0013	0.45953	1698	35	1714	16	1751	25	849	246.1	40.5	3.151	0.933489	3.02684	1751	25
HB-03-05	4.431	0.17	0.2994	0.0066	0.79838	3.34001	0.0736275	0.1072	0.0013	0.30801	1688	32	1717.9	11	1752	24	840	212.2	33.96	3.808	1.7405	3.65297	1752	24
HB-03-07	4.635	0.2	0.3162	0.0074	0.74701	3.16255	0.074013	0.1072	0.0012	0.53397	1771	36	1755	12	1752	23	791	226	38.2	3.281	-0.911681	-1.08447	1752	23
HB-03-14	4.787	0.28	0.3225	0.0081	0.86691	3.10078	0.0778799	0.10789	0.0012	0.13181	1802	39	1782	17	1764	22	421	188.2	32.44	2.087	-1.12233	-2.1542	1764	22
HB-03-13	4.665	0.27	0.3115	0.0088	0.86742	3.21027	0.0906915	0.109	0.0014	0.6498	1747	43	1760	17	1781	25	504	298	48.9	1.557	0.738636	1.90904	1781	25
HB-03-12	4.603	0.19	0.306	0.0069	0.74043	3.26797	0.0736896	0.1096	0.0012	0.24329	1721	33	1750	12	1792	23	401	221.4	34.7	1.679	1.65714	3.96205	1792	23
HB-03-15	4.742	0.28	0.3098	0.0068	0.65588	3.22789	0.070851	0.1104	0.0016	0.084311	1740	33	1774	17	1804	29	448	187	26.9	2.179	1.91657	3.54767	1804	29
HB-03-04	4.75	0.34	0.307	0.012	0.86988	3.25733	0.127322	0.1122	0.0023	0.83427	1727	59	1775	21	1834	39	276	152	27.2	1.731	2.70423	5.83424	1834	39
HB-03-03	3.55	0.55	0.218	0.016	0.95379	4.58716	0.336672	0.1192	0.0033	0.87685	1268	85	1536	45	1940	52	474	246.7	30.55	1.834	17.4479	34.6392	1940	52
SAMPLE HB-18
HB-18-03	4.022	0.22	0.2844	0.0069	0.79563	3.51617	0.085308	0.1042	0.0016	0.37266	1613	34	1638	16	1700	29	277	78.2	12.2	3.292	1.52625	5.11765	1700	29
HB-18-02	4.42	0.3	0.3051	0.0068	0.77952	3.27761	0.0730507	0.1057	0.0015	-0.090893	1717	33	1715	20	1725	28	248.4	61.2	10.21	3.712	-0.116618	0.463768	1725	28
HB-18-01	4.437	0.19	0.2996	0.0081	0.58723	3.33778	0.0902405	0.106	0.0019	0.53603	1696	42	1719	13	1731	35	245	58.7	9.8	3.79	1.33799	2.02195	1731	35
HB-18-04	3.977	0.22	0.2734	0.0056	0.60071	3.65764	0.0749188	0.1061	0.0017	0.18151	1558	28	1629	16	1733	31	260.9	71.1	10.55	3.393	4.3585	10.0981	1733	31
HB-18-05	3.31	0.46	0.226	0.015	0.97606	4.42478	0.29368	0.108	0.0018	0.68406	1313	77	1481	38	1764	31	381	169	16.3	2.14	11.3437	25.5669	1764	31
SAMPLE HB-27
HB-27-06	0.0471	0.0061	0.00585	0.00016	0.3265	170.94	4.67529	0.0577	0.0023	0.26895	37.58	1	46.7	5.4	506	99	1286	281	1.43	4.121	19.5289	92.5731	37.58	1	**
HB-27-03	0.0382	0.005	0.00586	0.00015	-0.045696	170.649	4.36813	0.048	0.0021	0.49275	37.65	0.98	38.1	4.5	104	90	1444	349	1.278	3.706	1.1811	63.7981	37.65	0.98
HB-27-04	0.04	0.006	0.00589	0.00015	-0.10898	169.779	4.32375	0.0493	0.0023	0.58868	37.88	0.93	39.8	5.4	150	99	1457	358	1.252	3.672	4.82412	74.7467	37.88	0.93
HB-27-05	0.0423	0.0086	0.00629	0.00016	-0.064778	158.982	4.04407	0.0496	0.0029	0.42313	40.43	1	42.1	7.2	140	130	1135	271	1.012	3.753	3.96675	71.1214	40.43	1
HB-27-08	0.0608	0.01	0.00896	0.00022	0.13735	111.607	2.74035	0.0496	0.0023	0.24664	57.51	1.4	60	8.8	170	98	748	384	2.23	1.759	4.15	66.1706	57.51	1.4
HB-27-07	0.0634	0.014	0.00907	0.00026	0.001	110.254	3.16052	0.0514	0.0035	0.44291	58.2	1.6	62.3	12	240	150	559	227.1	1.328	2.218	6.58106	75.75	58.2	1.6
HB-27-01	0.0773	0.0068	0.01134	0.00031	-0.065285	88.1834	2.41066	0.0499	0.0016	0.63162	72.7	2	75.6	5.5	183	71	805	381	2.874	1.885	3.83598	60.2732	72.7	2
HB-27-02	0.0763	0.01	0.0117	0.00033	0.18625	85.4701	2.4107	0.0465	0.0015	0.35718	75	2.1	74.7	8.5	35	62	745	424	2.82	1.576	-0.401606	-114.286	75	2.1
SAMPLE 15HBMD18b
15HBMD186-06	0.079	0.0027	0.01167	0.00019	0.001	85.6898	1.39512	0.0493	0.029	0.7168	74.8	1.2	77.2	2.5	160	350	498	416	2.88	1.147	3.10881	53.25	74.8	1.2
15HBMD186-02	0.102	0.0031	0.01517	0.00029	0.33445	65.9196	1.26016	0.0497	0.0021	0.14264	97.1	1.8	98.6	2.9	177	95	576	379	3.21	1.464	1.5213	45.1412	97.1	1.8
15HBMD186-14	0.1164	0.0062	0.01685	0.00091	0.87886	59.3472	3.2051	0.0497	0.0027	-0.081112	107.7	5.8	111.7	5.6	179	74	961	391	4.1	2.4	3.58102	39.8324	107.7	5.8
15HBMD186-01	0.47	0.11	0.0205	0.0013	0.96501	48.7805	3.0934	0.158	0.0021	-0.92141	130.8	8	375	75	2250	84	410.1	364	7.8	1.16	65.12	94.1867	130.8	8
15HBMD186-26	0.4004	0.0061	0.05345	0.00099	0.76177	18.7091	0.346529	0.05364	0.0029	0.46723	335.7	6	341.9	4.4	354	58	710	327	9.76	2.315	1.8134	5.16949	335.7	6
15HBMD186-32	0.4086	0.0054	0.05549	0.00072	0.053595	18.0213	0.233831	0.05306	0.0024	0.73496	348.1	4.4	347.8	3.9	330	120	664	145	4.82	4.67	-0.0862565	-5.48485	348.1	4.4
15HBMD186-18	0.4598	0.0083	0.05984	0.00088	0.39992	16.7112	0.245753	0.0548	0.0017	0.45626	374.6	5.4	384	5.8	400	70	475	81.5	3.2	5.76	2.44792	6.35	374.6	5.4
15HBMD186-07	0.4653	0.0094	0.06048	0.0009	0.63781	16.5344	0.246048	0.05507	0.0029	0.14672	378.5	5.5	387.8	6.6	414	61	336	167	6	1.99	2.39814	8.57488	378.5	5.5
15HBMD186-36	0.4616	0.0095	0.0609	0.0013	0.61341	16.4204	0.350517	0.055	0.0017	0.47003	381	8.1	385.3	6.6	410	70	332.5	265	9.25	1.311	1.11601	7.07317	381	8.1
15HBMD186-28	0.484	0.01	0.0619	0.00062	0.43076	16.1551	0.161812	0.0561	0.0018	0.083704	387.1	3.8	400.8	7.1	452	72	358.3	187	6.98	2.04	3.41816	14.3584	387.1	3.8
15HBMD186-11	0.497	0.016	0.0637	0.0014	0.58476	15.6986	0.345024	0.0562	0.002	0.08216	398.2	8.7	410	11	456	79	479	392	14.9	1.27	2.87805	12.6754	398.2	8.7
15HBMD186-35	0.5124	0.0088	0.0638	0.0013	0.37791	15.674	0.319376	0.0584	0.0021	0.50203	398.6	7.7	420	6	540	59	224	131.7	4.82	1.768	5.09524	26.1852	398.6	7.7
15HBMD186-04	0.49	0.012	0.0639	0.0011	0.2902	15.6494	0.269396	0.0562	0.0026	0.27733	399.1	6.9	407	7.3	454	55	122.9	144	5.51	0.834	1.94103	12.0925	399.1	6.9
15HBMD186-09	0.5	0.014	0.0657	0.0017	0.96078	15.2207	0.393838	0.05557	0.0018	0.19211	410	10	411.3	9.5	434	85	1060	800	31.9	1.269	0.316071	5.52995	410	10
15HBMD186-10	0.5262	0.0084	0.06907	0.00097	0.50976	14.4781	0.203326	0.05579	0.0027	0.49763	430.6	5.8	429.2	5.6	442	56	474	424	17.63	1.092	-0.326188	2.57919	430.6	5.8
15HBMD186-39	0.55	0.014	0.07148	0.0009	0.41099	13.9899	0.176146	0.0552	0.019	0.051693	445	5.4	445.1	9.1	414	200	219	119.8	4.91	1.903	0.0224669	-7.48792	445	5.4
15HBMD186-37	0.611	0.019	0.0775	0.0019	0.82831	12.9032	0.316337	0.0571	0.0037	-0.10844	481	11	486	11	491	50	325	74.6	3.252	4.48	1.02881	2.03666	481	11
15HBMD186-31	0.646	0.014	0.0813	0.0012	0.71254	12.3001	0.181552	0.05694	0.0018	-0.010832	504	6.9	505.8	8.7	496	76	484	52.2	2.63	9.94	0.355872	-1.6129	504	6.9
15HBMD186-16	1.96	0.28	0.0846	0.003	0.9234	11.8203	0.419161	0.166	0.0045	-0.8705	523	18	1080	99	2510	150	242	264	22.6	0.948	51.5741	79.1633	523	18
15HBMD186-29	0.703	0.016	0.0862	0.0016	0.52663	11.6009	0.215331	0.0588	0.002	0.23178	533.2	9.5	540.1	9.8	557	57	272	123	5.68	2.34	1.27754	4.27289	533.2	9.5
15HBMD186-40	0.7385	0.0083	0.09015	0.00096	0.51669	11.0926	0.118124	0.05937	0.0027	0.41817	556.4	5.7	561.5	4.8	580	61	785	136.5	6.58	6.01	0.908281	4.06897	556.4	5.7
15HBMD186-19	0.907	0.044	0.0942	0.0051	0.16497	10.6157	0.574736	0.0671	0.0021	0.60132	580	30	654	24	890	57	199	300	14.8	0.99	11.315	34.8315	580	30
15HBMD186-23	0.856	0.021	0.1011	0.0018	0.85061	9.8912	0.176104	0.06067	0.0018	-0.048708	623.8	9.6	628	11	627	64	382	223	13.8	1.765	0.66879	0.510367	623.8	9.6
15HBMD186-30	0.877	0.013	0.103	0.0014	0.58189	9.70874	0.131963	0.06156	0.0026	0.27821	632.2	7.9	641	6.4	657	55	238	149.4	9.01	1.671	1.37285	3.77473	632.2	7.9
15HBMD186-12	1.563	0.046	0.1561	0.0045	0.95941	6.40615	0.184674	0.07261	0.0029	0.16642	935	25	955	18	1003	54	492	135	10.26	3.572	2.09424	6.77966	935	25
15HBMD186-03	1.687	0.035	0.1699	0.003	0.2722	5.88582	0.103928	0.0727	0.0017	0.54547	1011	16	1003	13	1002	70	120.6	29.12	2.768	3.99	-0.797607	-0.898204	1011	16
15HBMD186-20	1.714	0.023	0.1718	0.0023	0.92024	5.82072	0.0779258	0.0722	0.0027	0.42352	1022	13	1013.7	8.5	991	54	591.4	348.9	35.5	1.698	-0.818783	-3.12815	1022	13
15HBMD186-33	1.829	0.048	0.178	0.006	0.94841	5.61798	0.18937	0.0746	0.002	0.83503	1056	33	1059	16	1064	77	540	259	27.3	2.162	0.283286	0.75188	1056	33
15HBMD186-22	1.862	0.027	0.1804	0.0026	0.8854	5.54324	0.0798915	0.07496	0.0019	0.12724	1069	14	1067.6	9.4	1067	71	359	205.8	22.01	1.776	-0.131135	-0.187441	1069	14
15HBMD186-13	2.65	0.23	0.211	0.019	0.99457	4.73934	0.426765	0.09102	0.0019	0.13336	1230	100	1303	66	1447	67	446	199	15.83	2.52	5.60246	14.9965	1230	100
15HBMD186-05	2.816	0.083	0.2183	0.0056	0.91146	4.58085	0.117512	0.0952	0.0018	0.18907	1273	30	1359	22	1531	63	226	160.7	18.2	1.381	6.32818	16.8517	1273	30
15HBMD186-08	3.094	0.049	0.2474	0.003	0.543	4.04204	0.0490142	0.0899	0.0028	0.30466	1430	17	1431	12	1421	56	91.3	41.76	5.93	2.089	0.0698812	-0.633357	1421	56
15HBMD186-24	3.069	0.05	0.245	0.0036	0.57188	4.08163	0.059975	0.09062	0.0023	0.53711	1413	18	1427	12	1438	66	218.5	107.1	15.5	2.087	0.981079	1.73853	1438	66
15HBMD186-38	3.148	0.057	0.2532	0.0032	0.78041	3.94945	0.049914	0.0904	0.0019	-0.038169	1455	17	1444	14	1439	75	122.1	145.1	19.74	0.858	-0.761773	-1.11188	1439	75
15HBMD186-15	3.148	0.029	0.2505	0.0028	0.67791	3.99202	0.0446213	0.09121	0.002	0.38392	1441	15	1444.3	7	1450	75	261	179.6	26.39	1.411	0.228484	0.62069	1450	75
15HBMD186-34	3.399	0.047	0.2585	0.0044	0.72828	3.86847	0.0658463	0.0937	0.0019	0.28185	1482	23	1504	11	1502	73	181.8	85.9	10.16	2.262	1.46277	1.33156	1502	73
15HBMD186-27	3.1	0.13	0.238	0.011	0.99592	4.20168	0.194195	0.09386	0.0016	0.67364	1373	58	1430	35	1505	68	580	367	48.89	1.646	3.98601	8.77076	1505	68
15HBMD186-21	3.354	0.025	0.2601	0.0034	0.71257	3.84468	0.0502572	0.09378	0.0027	0.6463	1490	17	1493.7	5.8	1508	62	182.3	99.4	15.38	1.875	0.247707	1.19363	1508	62
15HBMD186-25	3.938	0.051	0.2857	0.0026	0.76962	3.50018	0.0318532	0.09991	0.0021	0.021836	1620	13	1624	11	1622	85	195.5	104.4	17.22	1.906	0.246305	0.123305	1622	85
15HBMD186-17	7.06	0.11	0.3929	0.0067	0.90546	2.54518	0.0434021	0.13035	0.0017	0.38281	2136	31	2118	14	2102	64	338.9	149.9	33.6	2.245	-0.849858	-1.61751	2102	64
SAMPLE RD0814-35
RD0814-35-025	0.0716	0.0064	0.00847	0.00026	0.07309	118.064	3.62415	0.0582	0.0052	0.32575	54.4	1.7	70.1	6.1	580	210	3090	4760	22.5	0.628	22.3966	90.6207	54.4	1.7
RD0814-35-001	0.0608	0.004	0.0088	0.00022	0.001	113.636	2.84091	0.0523	0.0044	0.47938	56.5	1.4	59.9	3.8	270	180	665	241	1.26	3.02	5.67613	79.0741	56.5	1.4
RD0814-35-007	0.104	0.014	0.01175	0.00058	0.001	85.1064	4.201	0.0606	0.0075	0.49141	75.3	3.7	103	14	700	310	146.6	161	1.189	0.9177	26.8932	89.2429	75.3	3.7
RD0814-35-022	0.0873	0.0035	0.01358	0.0003	0.37688	73.6377	1.62675	0.0466	0.0023	0.27312	86.9	1.9	85	3.3	24	110	2480	1800	15.3	1.343	-2.23529	-262.083	86.9	1.9
RD0814-35-056	0.1089	0.005	0.01501	0.00041	0.001	66.6222	1.8198	0.053	0.0033	0.67061	96.1	2.6	104.9	4.5	320	140	463.7	278.7	2.38	1.657	8.38894	69.9688	96.1	2.6
RD0814-35-021	0.322	0.028	0.0206	0.0018	0.2635	48.5437	4.24168	0.11	0.012	0.57679	131	11	282	22	1730	220	6090	7140	127	0.845	53.5461	92.4277	131	11
RD0814-35-047	0.1563	0.0071	0.02248	0.00042	0.095493	44.484	0.831106	0.0495	0.0027	0.3757	143.3	2.7	147.4	6.2	169	120	1093	910	11.04	1.201	2.78155	15.2071	143.3	2.7
RD0814-35-044	0.169	0.011	0.02291	0.00044	0.47849	43.6491	0.838306	0.0528	0.0032	-0.16773	146	2.8	158	9.7	300	140	1600	2160	27.8	0.742	7.59494	51.3333	146	2.8
RD0814-35-030	0.302	0.022	0.0243	0.0008	0.075028	41.1523	1.35481	0.0917	0.007	0.32072	154.8	5	267	17	1470	140	191.4	136.3	2.386	1.385	42.0225	89.4694	154.8	5
RD0814-35-034	0.1896	0.0091	0.02722	0.00055	0.36403	36.7377	0.742312	0.0504	0.0027	0.16186	173.1	3.5	176.2	7.8	204	120	599	375	5.65	1.588	1.75936	15.1471	173.1	3.5
RD0814-35-029	0.1913	0.0073	0.02739	0.00041	0.31485	36.5097	0.546512	0.0526	0.0027	0.1119	174.2	2.6	177.7	6.2	302	120	1021	503	7.69	2.008	1.96961	42.3179	174.2	2.6
RD0814-35-031	0.1969	0.0076	0.02786	0.00035	0.32622	35.8937	0.450927	0.0508	0.0025	0.11713	177.1	2.2	182.4	6.5	228	110	1295	1435	22.1	0.902	2.9057	22.3246	177.1	2.2
RD0814-35-002	0.237	0.021	0.02802	0.00082	0.71817	35.6888	1.04443	0.0615	0.0047	-0.39247	178.1	5.2	215	17	630	160	369	381	6.2	1.058	17.1628	71.7302	178.1	5.2
RD0814-35-036	0.269	0.0081	0.03849	0.00056	0.48104	25.9808	0.378	0.04988	0.0021	0.46739	243.5	3.5	241.9	6.5	197	110	1551	563	12.49	2.68	-0.66143	-23.6041	243.5	3.5
RD0814-35-055	0.368	0.025	0.0407	0.0021	0.75141	24.57	1.26774	0.0651	0.0038	0.19542	257	13	321	20	806	120	267	780	11.6	0.412	19.9377	68.1141	257	13
RD0814-35-032	0.3612	0.011	0.04991	0.00058	0.4057	20.0361	0.232838	0.0523	0.0023	0.24555	314	3.5	313	8.1	296	100	1282	426	11.72	2.979	-0.319489	-6.08108	314	3.5
RD0814-35-014	0.661	0.083	0.0506	0.0018	0.63877	19.7629	0.703026	0.094	0.011	-0.39736	318	11	510	51	1550	230	181	398	10.88	0.461	37.6471	79.4839	318	11
RD0814-35-016	0.86	0.2	0.0604	0.0042	0.96099	16.5563	1.15126	0.096	0.017	-0.91896	378	26	600	110	1370	340	1210	1150	36.2	0.994	37	72.4088	378	26
RD0814-35-012	0.467	0.02	0.061	0.002	0.97676	16.3934	0.53749	0.05529	0.0023	-0.177	382	12	389	14	422	96	1970	1944	73.3	1.047	1.79949	9.47867	382	12
RD0814-35-035	0.588	0.024	0.0738	0.0017	0.28418	13.5501	0.31213	0.057	0.003	0.38163	459	10	469	16	502	110	487	341	12.1	1.5	2.1322	8.56574	459	10
RD0814-35-054	0.65	0.024	0.0774	0.002	0.58722	12.9199	0.333848	0.0603	0.0027	0.33355	480	12	508	15	624	110	480	53.9	1.41	8.75	5.51181	23.0769	480	12
RD0814-35-039	0.641	0.03	0.079	0.0032	0.74998	12.6582	0.512738	0.0593	0.0029	0.25094	490	19	502	18	572	100	642	316	13.43	2.024	2.39044	14.3357	490	19
RD0814-35-041	0.76	0.032	0.0897	0.0012	0.001	11.1483	0.149141	0.0623	0.0034	0.44482	554	6.9	573	19	675	120	208.7	455	21.5	0.471	3.31588	17.9259	554	6.9
RD0814-35-053	0.781	0.025	0.0924	0.001	0.001	10.8225	0.117127	0.0594	0.0027	0.47397	569.5	6.1	585.9	14	580	98	446	386	18.95	1.182	2.79911	1.81034	569.5	6.1
RD0814-35-010	0.748	0.025	0.093	0.0021	0.61387	10.7527	0.242803	0.0574	0.0025	0.33395	573	12	567	15	503	97	479	292.9	14.69	1.611	-1.0582	-13.9165	573	12
RD0814-35-017	0.854	0.032	0.1014	0.0017	0.51988	9.86193	0.165338	0.0602	0.0029	0.15796	622.5	10	629	16	604	100	518	438	23.8	1.169	1.03339	-3.06291	622.5	10
RD0814-35-026	0.932	0.027	0.1084	0.0021	0.6857	9.22509	0.178715	0.0635	0.0027	0.35896	663	12	668	14	724	91	1122	359.4	21.95	3.05	0.748503	8.42541	663	12
RD0814-35-052	1.409	0.039	0.1235	0.0014	0.554	8.09717	0.0917897	0.07996	0.0034	0.24012	750.4	7.9	892.5	16	1200	80	1174	478	28.17	2.446	15.9216	37.4667	750.4	7.9
RD0814-35-046	1.454	0.044	0.1393	0.0027	0.81905	7.17875	0.139143	0.07399	0.0031	0.21874	841	15	911	18	1040	83	851	1047	54	0.807	7.68386	19.1346	841	15
RD0814-35-018	1.884	0.098	0.1501	0.0074	0.9843	6.66223	0.328451	0.08899	0.0037	0.12976	901	41	1073	35	1403	79	2660	509	23.79	5.15	16.0298	35.7805	901	41
RD0814-35-058	2.11	0.31	0.164	0.024	0.98969	6.09756	0.892326	0.0953	0.0041	0.32068	970	140	1130	110	1533	84	591	239	19.2	2.38	14.1593	36.7254	970	140
RD0814-35-011	2.083	0.073	0.1656	0.0042	0.88838	6.03865	0.153154	0.09151	0.0037	0.57827	988	23	1143	24	1457	78	390	122	16.6	3.31	13.5608	32.1894	988	23
RD0814-35-019	2.35	0.12	0.1676	0.0069	0.9643	5.96659	0.245641	0.098	0.0041	0.030369	998	38	1226	37	1586	76	809	212	27.8	3.78	18.5971	37.0744	998	38
RD0814-35-015	2.61	0.24	0.183	0.015	0.99257	5.46448	0.447908	0.1022	0.0042	-0.4215	1080	83	1293	68	1663	76	1900	6370	169	0.345	16.4733	35.0571	1080	83
RD0814-35-050	2.137	0.061	0.1909	0.0029	0.30267	5.23834	0.0795767	0.0773	0.0035	0.64762	1126	16	1161	20	1128	85	232	116.5	11.89	1.996	3.01464	0.177305	1126	16
RD0814-35-042	2.146	0.072	0.1959	0.0034	0.83566	5.10464	0.0885952	0.0798	0.0033	-0.086265	1153	18	1163	23	1190	83	543	661	64.2	0.824	0.859845	3.10924	1153	18
RD0814-35-033	2.219	0.076	0.1981	0.003	0.35333	5.04796	0.0764456	0.0801	0.0037	0.23788	1165	16	1186	24	1198	91	144.7	74.8	7.67	1.896	1.77066	2.75459	1165	16
RD0814-35-023	2.178	0.071	0.2018	0.0031	0.62768	4.9554	0.0761236	0.0776	0.0033	0.091163	1185	17	1173	23	1134	84	249	126	13.52	1.953	-1.02302	-4.49735	1185	17
RD0814-35-003	2.157	0.072	0.2032	0.0036	0.71039	4.92126	0.0871877	0.0782	0.0034	0.13592	1193	19	1171	25	1157	82	501	18.3	2.02	27.3	-1.87874	-3.1115	1193	19
RD0814-35-027	2.6	0.19	0.221	0.011	0.92894	4.52489	0.225221	0.0876	0.0042	-0.48234	1285	57	1295	54	1369	98	267	144.3	16.5	1.839	0.772201	6.13587	1285	57
RD0814-35-051	2.744	0.074	0.2289	0.0033	0.66415	4.36872	0.0629829	0.08439	0.0036	0.4033	1329	18	1340.2	20	1301	80	368	272	31.5	1.353	0.835696	-2.15219	1301	80
RD0814-35-013	3.031	0.094	0.2483	0.0045	0.81551	4.02739	0.0729893	0.08723	0.0036	-0.049029	1429	23	1415	24	1365	79	836	418	57.7	1.98	-0.989399	-4.68864	1365	79
RD0814-35-005	3.17	0.13	0.2463	0.0075	0.88336	4.06009	0.123632	0.0933	0.0039	0.06375	1419	39	1448	32	1501	91	913	291	39.8	3.1	2.00276	5.46302	1501	91
RD0814-35-048	3.317	0.11	0.2458	0.0042	0.83791	4.06835	0.0695161	0.0949	0.0041	-0.12149	1416	22	1484	26	1526	80	962	54.8	7.06	17.47	4.58221	7.20839	1526	80
RD0814-35-008	3.884	0.13	0.2893	0.006	0.9464	3.45662	0.0716893	0.0985	0.004	0.45324	1638	30	1609	27	1594	77	2400	114.4	14.59	20	-1.80236	-2.76035	1594	77
RD0814-35-049	4.1	0.15	0.2891	0.0072	0.82003	3.45901	0.0861462	0.0991	0.0043	0.28602	1645	38	1653	29	1606	79	203.8	114.6	16.69	1.765	0.483969	-2.42839	1606	79
RD0814-35-006	4.433	0.13	0.3158	0.0054	0.62525	3.16656	0.0541464	0.1018	0.0042	0.52162	1769	27	1718	24	1656	78	270	195	30.9	1.359	-2.96857	-6.82367	1656	78
RD0814-35-037	4.338	0.12	0.303	0.0041	0.85219	3.30033	0.0446579	0.10269	0.0042	0.0016361	1706	20	1700	23	1673	75	1269	2138	324.6	0.5878	-0.352941	-1.9725	1673	75
RD0814-35-038	4.625	0.15	0.3182	0.006	0.84587	3.14268	0.0592585	0.1047	0.0044	0.11735	1780	29	1753	27	1709	76	690	299	50	2.53	-1.54022	-4.15448	1709	76
RD0814-35-040	4.368	0.12	0.2982	0.0045	0.82334	3.35345	0.0506054	0.10559	0.0043	0.35284	1682	22	1706	23	1724	74	1827	1580	237	1.14	1.4068	2.43619	1724	74
RD0814-35-009	3.42	0.2	0.234	0.012	0.97083	4.2735	0.219154	0.1062	0.0044	0.20079	1356	66	1506	47	1734	78	571	151	15.6	3.87	9.96016	21.7993	1734	78
RD0814-35-059	4.316	0.13	0.2963	0.0043	0.89319	3.37496	0.0489785	0.10678	0.0042	-0.16628	1673	21	1696	25	1745	75	459	209	30.6	2.62	1.35613	4.12607	1745	75
RD0814-35-028	4.44	0.15	0.3088	0.0079	0.98008	3.23834	0.0828462	0.10685	0.0042	0.29404	1734	39	1719	28	1746	74	2830	97	17.4	34.1	-0.8726	0.687285	1746	74
RD0814-35-024	5.052	0.15	0.3241	0.0063	0.65853	3.08547	0.0599767	0.1137	0.0048	0.38997	1809	30	1828	25	1858	77	284	56.4	9.8	4.9	1.03939	2.63724	1858	77
RD0814-35-045	4.98	0.17	0.3166	0.0047	0.74683	3.15856	0.0468896	0.1138	0.0048	-0.2393	1773	23	1815	29	1859	78	400	186	28	2.11	2.31405	4.62614	1859	78
RD0814-35-043	6.27	0.19	0.3648	0.0063	0.90498	2.74123	0.0473403	0.1268	0.0051	-0.11461	2005	30	2014	27	2054	72	351	288	50.9	1.227	0.446872	2.38559	2054	72
RD0814-35-020	11.72	0.66	0.447	0.024	0.98206	2.23714	0.120115	0.1857	0.0078	0.33065	2380	100	2577	51	2704	67	776	396	103	2.25	7.64455	11.9822	2704	67
RD0814-35-004	10.12	0.29	0.3913	0.0033	0.80773	2.55558	0.0215523	0.1899	0.0077	-0.22102	2129	15	2449	24	2741	68	1555	114.8	21.4	13.52	13.0666	22.3276	2741	68
RD0814-35-057	13.53	0.45	0.491	0.011	0.5729	2.03666	0.0456278	0.2048	0.0092	0.26386	2573	46	2716	31	2871	71	125	47.5	10.13	2.57	5.2651	10.3797	2871	71
SAMPLE RD0814-37
RD0814-37-003	0.227	0.084	0.0219	0.004	0.054737	45.6621	8.34011	0.081	0.018	0.27503	139	25	243	67	1280	390	85	35	0.39	3.21	42.7984	89.1406	139	25
RD0814-37-018	0.239	0.018	0.0296	0.0018	0.98786	33.7838	2.05442	0.05841	0.0022	-0.10546	188	11	217	15	544	83	3310	452	2.55	10.08	13.3641	65.4412	188	11
RD0814-37-021	0.41	0.034	0.0417	0.0018	0.39167	23.9808	1.03514	0.0692	0.006	0.1009	263	11	355	21	910	170	94	59	1.25	2.082	25.9155	71.0989	263	11
RD0814-37-028	0.338	0.026	0.0437	0.0031	0.94824	22.8833	1.6233	0.05542	0.0022	0.4001	276	19	295	20	427	88	960	417	8.5	2.98	6.44068	35.363	276	19
RD0814-37-026	0.412	0.081	0.0499	0.0093	0.75974	20.0401	3.73493	0.0619	0.0077	-0.22517	313	57	345	59	700	300	29.1	16.5	0.488	2.125	9.27536	55.2857	313	57
RD0814-37-031	0.525	0.065	0.0531	0.0041	0.34332	18.8324	1.4541	0.073	0.0083	0.071669	333	25	425	43	1030	190	301	112	3.6	3.22	21.6471	67.6699	333	25
RD0814-37-027	0.438	0.02	0.056	0.0015	0.78904	17.8571	0.478316	0.05685	0.0021	0.32621	350.9	8.9	368.4	14	485	84	728	194	5.68	4.76	4.75027	27.6495	350.9	8.9
RD0814-37-025	0.43	0.023	0.0562	0.0037	0.6164	17.7936	1.17146	0.061	0.01	0.94715	352	23	363	17	530	240	950	78	2.7	24.7	3.0303	33.5849	352	23
RD0814-37-030	0.447	0.025	0.0566	0.0018	0.48466	17.6678	0.561875	0.058	0.0029	0.64075	355	11	375	18	519	110	489	96.1	3.03	5.64	5.33333	31.5992	355	11
RD0814-37-032	0.488	0.026	0.057	0.0027	0.93047	17.5439	0.831025	0.0624	0.0025	0.80925	357	16	403	17	686	88	1136	1250	25.4	1.049	11.4144	47.9592	357	16
RD0814-37-002	0.517	0.069	0.0607	0.0065	0.9256	16.4745	1.76415	0.0647	0.0033	-0.09767	379	40	429	48	754	110	656	227	8.6	3.39	11.655	49.7347	379	40
RD0814-37-009	0.509	0.028	0.0615	0.0019	0.022403	16.2602	0.502347	0.0608	0.0037	0.56144	388	12	418	19	620	130	197	200	7.13	1.163	7.17703	37.4194	388	12
RD0814-37-016	0.505	0.054	0.0624	0.0051	0.9638	16.0256	1.30979	0.0582	0.0028	-0.56631	390	31	413	37	531	110	748	199	9.7	7.3	5.56901	26.5537	390	31
RD0814-37-012	0.623	0.029	0.0706	0.0015	0.26062	14.1643	0.300941	0.065	0.003	0.6294	440	9.3	491.7	18	768	95	293	302	12.7	1.239	10.5145	42.7083	440	9.3
RD0814-37-017	0.606	0.04	0.0709	0.0029	0.81443	14.1044	0.576907	0.0629	0.0028	-0.010875	441	17	480	26	700	97	433.6	66	0.99	12.6	8.125	37	441	17
RD0814-37-010	0.781	0.091	0.0732	0.0093	0.97824	13.6612	1.73565	0.0779	0.0033	0.64266	454	56	580	52	1141	83	720	151	8	5.56	21.7241	60.2103	454	56
RD0814-37-022	0.745	0.053	0.0793	0.0032	0.65763	12.6103	0.508866	0.0679	0.0038	0.076633	492	19	564	31	853	120	100.4	135.1	6.07	0.956	12.766	42.3212	492	19
RD0814-37-006	0.881	0.068	0.0819	0.0036	0.96424	12.21	0.536704	0.0789	0.0036	-0.66596	507	22	640	36	1178	96	1114	343	24.8	4.24	20.7812	56.961	507	22
RD0814-37-029	0.9	0.2	0.086	0.019	0.99478	11.6279	2.56896	0.0775	0.0032	0.025406	530	110	630	110	1132	82	2380	270	5.6	20	15.873	53.1802	530	110
RD0814-37-019	1.44	0.25	0.092	0.015	0.45412	10.8696	1.77221	0.1122	0.0073	0.051481	563	91	880	110	1822	110	820	880	20.2	1.17	36.0227	69.0999	563	91
RD0814-37-020	0.842	0.04	0.0983	0.0019	0.73684	10.1729	0.196629	0.061	0.0024	0.22807	605	11	620	22	645	91	562	447	24.1	1.79	2.41935	6.20155	605	11
RD0814-37-004	0.887	0.051	0.1012	0.0019	0.001	9.88142	0.185521	0.0635	0.0035	0.65935	621	11	649	25	730	130	132	208	12	0.716	4.31433	14.9315	621	11
RD0814-37-008	0.909	0.042	0.1055	0.0012	0.001	9.47867	0.107814	0.063	0.0028	0.66188	646.3	7	656	22	704	94	389	496	30.8	0.922	1.47866	8.19602	646.3	7
RD0814-37-024	1.2	0.16	0.114	0.013	0.96789	8.77193	1.00031	0.0752	0.0036	-0.37145	697	74	790	78	1069	95	83.2	174	13	0.67	11.7722	34.7989	697	74
RD0814-37-013	2.97	0.32	0.1134	0.0095	0.81221	8.81834	0.73875	0.196	0.015	-0.24648	704	52	1446	74	2770	120	1050	477	87.2	2.726	51.314	74.5848	704	52
RD0814-37-015	1.89	0.25	0.133	0.018	0.99415	7.5188	1.01758	0.1023	0.0039	0.17839	803	100	1058	95	1665	71	2000	550	25.5	4.82	24.1021	51.7718	803	100
RD0814-37-023	1.45	0.13	0.1392	0.0096	0.97951	7.18391	0.495442	0.0759	0.0029	0.28875	839	55	906	56	1091	78	259.5	142	8.81	2.4	7.39514	23.0981	839	55
RD0814-37-011	1.5	0.21	0.143	0.019	0.98934	6.99301	0.929141	0.0772	0.0029	0.13008	860	110	933	89	1133	86	770	256	18.7	4.45	7.82422	24.0953	860	110
RD0814-37-001	1.662	0.073	0.1602	0.0016	0.001	6.2422	0.062344	0.0756	0.003	0.57244	958.1	8.8	996	30	1083	80	312	95.1	8.14	3.5	3.80522	11.5328	958.1	8.8
RD0814-37-005	2.63	0.23	0.212	0.015	0.78519	4.71698	0.333749	0.0928	0.0043	0.095609	1237	79	1300	67	1479	86	173	112.5	14.46	1.603	4.84615	16.3624	1237	79
RD0814-37-014	3.73	0.42	0.216	0.016	0.93028	4.62963	0.342936	0.1223	0.0065	-0.4706	1259	87	1560	96	1982	91	298	84	11.4	4.57	19.2949	36.4783	1259	87
RD0814-37-007	4.63	0.22	0.3137	0.0086	0.9531	3.18776	0.0873915	0.10865	0.0039	0.50924	1758	42	1755	40	1777	66	370	98.3	14.9	4.61	-0.17094	1.06922	1777	66
RD0814-37-033	4.07	0.28	0.248	0.015	0.97918	4.03226	0.243887	0.1207	0.0045	0.42827	1423	78	1644	57	1965	68	383	155.5	17.8	2.65	13.4428	27.5827	1965	68
SAMPLE RD0814-40
RD0814-40-002	0.0996	0.0048	0.01504	0.00023	0.63184	66.4894	1.01679	0.0486	0.0018	-0.0732	96.2	1.4	96.4	4.5	128	84	1990	1090	9	1.64	0.207469	24.8437	96.2	1.4
RD0814-40-008	0.1042	0.0059	0.01541	0.00022	0.046646	64.8929	0.92644	0.0505	0.003	0.22276	98.5	1.4	100.6	5.4	210	130	743	279.2	2.34	2.596	2.08748	53.0952	98.5	1.4
RD0814-40-014	0.515	0.04	0.0207	0.0015	0.99476	48.3092	3.50067	0.1806	0.0047	-0.63801	131.8	9.3	420	26	2662	42	12300	903	115.2	13.2	68.619	95.0488	131.8	9.3
RD0814-40-007	0.1755	0.01	0.02555	0.00041	0.58079	39.1389	0.628061	0.0508	0.0025	-0.25125	162.7	2.6	164.1	8.7	224	110	528	544	7.52	0.943	0.853138	27.3661	162.7	2.6
RD0814-40-015	0.588	0.062	0.0269	0.0026	0.99422	37.1747	3.5931	0.1577	0.0045	-0.74246	171	16	465	41	2429	52	6600	2770	42.5	2.335	63.2258	92.9601	171	16
RD0814-40-006	0.529	0.018	0.06823	0.00085	0.68352	14.6563	0.182586	0.05678	0.0016	0.14489	425.4	5.1	431.3	12	482	60	1447	1138	42	1.233	1.36796	11.7427	425.4	5.1
RD0814-40-004	0.5348	0.018	0.0697	0.001	0.63279	14.3472	0.205842	0.05702	0.0019	-0.034235	434.5	6.2	434.9	11	491	64	827	437	16.2	1.843	0.0919752	11.5071	434.5	6.2
RD0814-40-001	3.64	0.18	0.157	0.0059	0.98022	6.36943	0.239361	0.1712	0.0046	-0.20252	940	33	1557	39	2569	45	3740	607	38.1	5.77	39.6275	63.4099	940	33
RD0814-40-011	2.006	0.066	0.1905	0.0031	0.52409	5.24934	0.0854224	0.0772	0.0023	0.4383	1124	17	1117	22	1126	62	386	158	15.1	2.432	-0.626679	0.17762	1124	17
RD0814-40-005	2.804	0.086	0.2359	0.0037	0.77778	4.23908	0.0664884	0.0883	0.0025	0.2669	1365	19	1356.3	22	1387	54	437	720	85	0.602	-0.641451	1.58616	1387	54
RD0814-40-012	3.991	0.13	0.2847	0.0057	0.82557	3.51247	0.0703234	0.1014	0.0026	0.16047	1615	29	1632	27	1655	56	369	180.5	25.22	1.999	1.04167	2.41692	1655	56
RD0814-40-003	4.294	0.14	0.3003	0.0036	0.8232	3.33	0.0399201	0.10501	0.0028	-0.054315	1693	18	1692	26	1714	49	475	272	39.9	1.78	-0.0591017	1.2252	1714	49
RD0814-40-010	4.862	0.14	0.3184	0.0029	0.74741	3.1407	0.0286056	0.11235	0.003	0.24343	1782	14	1795.6	24	1837	49	655	229	36.3	2.81	0.757407	2.99401	1837	49
RD0814-40-009	5.92	0.22	0.3551	0.0059	0.82105	2.81611	0.0467897	0.123	0.0037	-0.28829	1959	28	1963	31	1998	53	102.5	31.6	5.48	3.187	0.20377	1.95195	1998	53
SAMPLE RD0814-41
RD0814-41-001	0.132	0.013	0.01066	0.00051	0.001	93.8086	4.48803	0.0892	0.0087	0.48696	68.4	3.2	126	12	1360	180	91.1	76.6	0.647	1.152	45.7143	94.9706	68.4	3.2
RD0814-41-008	0.107	0.017	0.01482	0.00074	0.46383	67.4764	3.36927	0.0519	0.0075	-0.1892	94.8	4.7	102	15	240	290	128	66	0.6	1.831	7.05882	60.5	94.8	4.7
RD0814-41-040	0.223	0.033	0.0209	0.0037	0.86431	47.8469	8.4705	0.0808	0.0081	0.48562	133	23	203	27	1160	200	194	131	1.38	1.421	34.4828	88.5345	133	23
RD0814-41-031	0.325	0.023	0.0398	0.0018	0.57513	25.1256	1.13634	0.0577	0.0028	0.085213	252	11	295	18	540	85	850	316	5	2.54	14.5763	53.3333	252	11
RD0814-41-032	0.438	0.041	0.0476	0.0067	0.31166	21.0084	2.95707	0.067	0.012	0.66581	299	42	367	29	710	260	313	573	17.3	0.64	18.5286	57.8873	299	42
RD0814-41-037	0.402	0.016	0.0536	0.0016	0.83563	18.6567	0.556917	0.05416	0.0017	0.079241	336.7	9.8	342.9	12	375	70	1460	361	8.76	3.92	1.80811	10.2133	336.7	9.8
RD0814-41-020	0.454	0.017	0.059	0.0015	0.001	16.9491	0.430911	0.0542	0.0024	0.6943	369.6	9.4	380	12	370	100	172.9	214	7.02	0.767	2.73684	0.108108	369.6	9.4
RD0814-41-002	0.459	0.016	0.06041	0.00051	0.10057	16.5536	0.13975	0.0548	0.0017	0.24645	378.1	3.1	383.3	11	413	81	799	274	8.84	2.761	1.35664	8.45036	378.1	3.1
RD0814-41-023	0.508	0.021	0.0626	0.001	0.57521	15.9744	0.255183	0.0591	0.0021	-0.042647	391.3	6.1	417	14	567	76	344.3	171.1	6.33	1.875	6.16307	30.9877	391.3	6.1
RD0814-41-030	0.51	0.048	0.0637	0.0047	0.9705	15.6986	1.15829	0.0591	0.0019	-0.014147	398	29	424	30	569	70	493	455	14.5	1.066	6.13208	30.0527	398	29
RD0814-41-035	0.705	0.025	0.0763	0.0023	0.78902	13.1062	0.395074	0.0669	0.002	0.44214	474	14	542	15	832	64	675	667	25.8	0.972	12.5461	43.0288	474	14
RD0814-41-027	0.632	0.026	0.0798	0.0013	0.12951	12.5313	0.204144	0.058	0.0023	0.3234	494.9	7.5	497	16	523	86	388	417	18.2	0.884	0.422535	5.37285	494.9	7.5
RD0814-41-029	0.731	0.03	0.0825	0.0015	0.81469	12.1212	0.220386	0.0656	0.002	-0.10093	510.7	9	557	17	793	63	347	268	12.03	1.208	8.31239	35.599	510.7	9
RD0814-41-033	0.713	0.037	0.0847	0.0022	0.21257	11.8064	0.306659	0.0617	0.0031	0.31715	524	13	546	21	649	110	236	172	8.2	1.359	4.0293	19.2604	524	13
RD0814-41-005	1.09	0.14	0.0857	0.0089	0.9919	11.6686	1.21179	0.0923	0.0037	-0.87185	529	53	738	72	1467	80	719	276	14.37	2.435	28.3198	63.94	529	53
RD0814-41-011	0.682	0.028	0.0863	0.0013	0.26026	11.5875	0.174551	0.0573	0.0024	0.22216	533.9	7.7	528	17	497	90	205.1	185.5	8.93	1.042	-1.11742	-7.42455	533.9	7.7
RD0814-41-007	0.764	0.028	0.092	0.0015	0.45976	10.8696	0.177221	0.0608	0.002	0.20774	567.1	8.8	576	16	654	73	325	172	9.5	1.715	1.54514	13.2875	567.1	8.8
RD0814-41-014	0.812	0.039	0.0953	0.0023	0.001	10.4932	0.253246	0.0619	0.0027	0.58332	590	13	603	22	663	92	158	112	6.21	1.313	2.15589	11.0106	590	13
RD0814-41-016	0.829	0.043	0.0965	0.0029	0.69405	10.3627	0.311418	0.0612	0.0024	-0.078109	594	17	612	24	656	79	241.7	153	8.02	1.46	2.94118	9.45122	594	17
RD0814-41-026	0.806	0.031	0.0968	0.0015	0.62886	10.3306	0.160081	0.061	0.0019	-0.050033	595.6	8.7	600	17	638	65	900	592	31.5	1.459	0.733333	6.64577	595.6	8.7
RD0814-41-017	0.837	0.035	0.0985	0.0019	0.6039	10.1523	0.195831	0.061	0.0021	-0.012006	606	11	617	19	635	74	282	183	10.23	1.435	1.78282	4.56693	606	11
RD0814-41-024	0.823	0.037	0.0987	0.0018	0.33705	10.1317	0.184773	0.062	0.0025	0.13504	607	11	609	21	686	92	136.4	125.8	6.97	1.008	0.328407	11.516	607	11
RD0814-41-018	1.46	0.18	0.1063	0.0089	0.97441	9.40734	0.787632	0.0968	0.005	-0.72268	650	52	902	72	1573	92	941	461	22.6	1.84	27.9379	58.6777	650	52
RD0814-41-015	3.51	0.75	0.145	0.031	0.99888	6.89655	1.47443	0.1736	0.0047	0.32194	860	170	1460	160	2592	45	1220	720	83.7	1.53	41.0959	66.821	860	170
RD0814-41-028	1.719	0.063	0.1699	0.0038	0.8553	5.88582	0.131643	0.0739	0.0022	0.16931	1011	21	1015	23	1038	58	558	790	66	0.83	0.394089	2.60116	1011	21
RD0814-41-010	1.91	0.055	0.1818	0.0022	0.47152	5.50055	0.0665633	0.0763	0.0021	0.5123	1077	12	1084.3	19	1102	55	358	63	5.89	5.31	0.673245	2.2686	1077	12
RD0814-41-022	2.578	0.12	0.1908	0.0073	0.97297	5.24109	0.200524	0.098	0.0026	0.19496	1125	39	1299	36	1586	49	666	296	32	2.25	13.3949	29.0668	1125	39
RD0814-41-009	2.589	0.084	0.2243	0.0028	0.78748	4.45831	0.0556544	0.0848	0.0023	-0.13541	1304	15	1297	24	1311	55	338	176	20.9	1.786	-0.539707	0.533944	1311	55
RD0814-41-038	4.003	0.12	0.2895	0.0051	0.78411	3.45423	0.0608518	0.1015	0.0029	0.52773	1639	26	1634	25	1650	52	180.7	73.9	11.01	2.329	-0.305998	0.666667	1650	52
RD0814-41-039	4.148	0.15	0.2894	0.0062	0.98735	3.45542	0.0740278	0.10492	0.0027	-0.15978	1638	31	1663	29	1713	48	846	560	81.5	1.445	1.50331	4.37828	1713	48
RD0814-41-012	4.661	0.15	0.3122	0.0057	0.53813	3.20308	0.0584802	0.1082	0.0034	0.42587	1751	28	1760	27	1776	57	213	37.4	6.13	5.267	0.511364	1.40766	1776	57
RD0814-41-019	3.7	0.27	0.2343	0.004	0.65065	4.26803	0.0728644	0.1129	0.0069	-0.4972	1357	21	1578	60	1832	110	125	50.9	9.08	2.221	14.0051	25.9279	1832	110
RD0814-41-025	5.67	0.2	0.3344	0.006	0.62623	2.99043	0.053656	0.1255	0.0038	0.45439	1860	29	1926	29	2035	52	144	79.1	13.85	1.699	3.42679	8.59951	2035	52
*	2-sig abs (propagated)- isotope ratio errors are absolute 2-sigma errors propagated to include instrumental errors and standard analysis errors.
^	2-sig (abs)-age errors are 2-sigma absolute errors.
	Preferred Age utilizes Age 206Pb/238U <1300 Ma > Age 207Pb/206Pb
	Percent Discordant 6/8 vs 7/5 = (1-((Age 206Pb/238U)/(Age207Pb/235U))*100)
	Percent Discordant 6/8 vs 7/6 = (1-((Age 206Pb/238U)/(Age207Pb/206Pb))*100)
	Analyses highlighted in gray are excluded from data interpretation due to discordance cutoffs (6/8 vs 7/5 >10% and 6/8 vs 7/6 >15% or <-5%)
**	sample contamination?
Location Information
Sample number	Lat_WGS84	LONG_WGS 84	UTMx_83	UTMy_83	Section number	Section Level	Other
SAMPLE HB-03	41.9824	-106.515	374533	4.64893e+06	Coal 83-84	24m	n/a
SAMPLE HB-18	41.9658	-106.43	381541	4.64697e+06	Coal 87	32.5 m	n/a
SAMPLE HB-27	41.9605	-106.443	380436	4.6464e+06	Coal 90	4.5 m	n/a
SAMPLE 15HBMD18b	41.9901	-106.52	374091	4.64979e+06	Coal 87	31 m	n/a
RD0814-35	41.976	-106.44	380720	4.64811e+06	n/a	n/a	Coal 88
SAMPLE RD0814-37	42.0119	-106.525	373702	4.65222e+06	n/a	n/a	Coal 88
SAMPLE RD0814-41	42.0043	-106.516	374430	4.65137e+06	n/a	n/a	Coal 88 b

## Sheet: Sample Location Info
Sample number	Lat_WGS84	LONG_WGS 84	UTMx_83	UTMy_83	Section number	Section Level	Other
SAMPLE HB-03	41.9824	-106.515	374533	4.64893e+06	Coal 83-84	24m	n/a
SAMPLE HB-18	41.9658	-106.43	381541	4.64697e+06	Coal 87	32.5 m	n/a
SAMPLE HB-27	41.9605	-106.443	380436	4.6464e+06	Coal 90	4.5 m	n/a
SAMPLE 15HBMD18b	41.9901	-106.52	374091	4.64979e+06	Coal 87	31 m	n/a
RD0814-35	41.976	-106.44	380720	4.64811e+06	n/a	n/a	Coal 88
SAMPLE RD0814-37	42.0119	-106.525	373702	4.65222e+06	n/a	n/a	Coal 88
SAMPLE RD0814-41	42.0043	-106.516	374430	4.65137e+06	n/a	n/a	Coal 88 b
