# Supplementary material
Source: publisher figshare collection journal article supplement (https://gsapubs.figshare.com/ndownloader/files/22412034)
Supplement: Supplementary file 1 [file 22412034 › Sup 3. carbon isotope data.xlsx]

## Sheet: 13C Isotopes Hanna Basin
SIREAL Breaks
OurLabID	Sample ID	Analysis_Date_Time	Analysis_Comment	Amount weighed (mg)	NOTES	d13C (V-PDB)	Mass Fraction C (%)	Stratigraphic Level (m)	Latitude WGS 84	Longitude WGS 84	Section
G-5932	PH-TB-15-02	2017-03-04 04:23:22	NO DIL	2.024		-26.86	0.7	4.5	41.9858	-105.565
G-5934	PH-TB-15-04	2017-03-04 04:13:30	NO DIL	2.012		-26.23	0.65	193.9	41.9852	-105.562
G-5936	PH-TB-15-06	2017-03-04 04:33:13	NO DIL	1.026		-26.54	5.12	207.5	41.9851	-105.562
G-5940	PH-TB-15-10	2017-03-04 02:15:10	NO DIL	0.832		-27.11	3.18	229.1	41.9894	-105.559	Leg 17 TB
G-5941	PH-TB-15-11	2017-03-04 01:55:27	NO DIL	1.21	coal 81	-27.2	4.71	235.5	41.9893	-105.559	Leg 17 TB
G-5943	PH-TB-15-13	2017-03-03 14:50:34		1.468		-27.39	47.5	249	41.9892	-105.558	Leg 17 TB
G-5944	PH-TB-15-14	2017-03-04 02:25:02	NO DIL	1.624		-26.12	0.31	267.3	41.9892	-105.558	Leg 17 TB
G-5945	PH-TB-15-15	2017-03-01 11:22:01	RR 1500 DIL	0.974	coal 82	-25.38	18.3	283.8	41.989	-105.558	Leg 17 TB
G-5945	PH-TB-15-15	2017-03-03 14:20:59		1.471	coal 82	-25.56	25.9	283.8	41.989	-105.558	Leg 17 TB
G-5946	PH-TB-15-16	2017-03-04 03:34:03	NO DIL	1.854	coal 82	-27.2	1.17	317.2	41.9888	-105.557	Leg 17 TB
G-5947	PH-TB-15-17	2017-03-03 15:30:00		1.77	coal 82	-27.28	9.82	323	41.9889	-105.557	Leg 17 TB
G-5948	PH-TB-15-18	2017-03-04 01:16:00	NO DIL	1.6	coal 83?	-26.34	0.44	418.5	41.9883	-105.556	Leg 17 TB
G-5949	PH-TB-15-19	2017-03-01 12:11:19	RR 1800 DIL	1.242	coal 83?	-25.23	11.04	432	41.988	-105.556	Leg 17 TB
G-5949	PH-TB-15-19	2017-03-03 14:40:42		1.708	coal 83?	-25.22	11.74	432	41.988	-105.556	Leg 17 TB
G-5953	PH-TB-15-23	2017-03-04 02:34:53	NO DIL	1.07	coal 85?	-27.16	6.76	478.9	41.9878	-105.555	Leg 17 TB
G-5955	PH-TB-15-25	2017-03-04 02:54:37	NO DIL	0.955		-25.93	2.41	498	41.9876	-105.555	Leg 17 TB
G-5956	PH-TB-15-26	2017-03-03 15:20:09		1.747	coal 85?	-26.38	18.1	521.4	41.9874	-105.555	Leg 17 TB
G-5960	PH-TB-15-30	2017-03-04 03:43:55	NO DIL	0.953		-27.68	8.13	549.5	41.9871	-105.554	Leg 17 TB
G-5962	PH-TB-15-32	2017-03-01 13:00:37	RR 1800 DIL	1.077		-26.81	12	556.5	41.9871	-105.554	Leg 17 TB
G-5962	PH-TB-15-32	2017-03-03 15:00:25		1.822		-26.89	10.79	556.5	41.9871	-105.554	Leg 17 TB
G-5963	PH-TB-15-33	2017-03-04 02:44:45	NO DIL	1.015		-27.03	6.33	561	41.9871	-105.554	Leg 17 TB
G-5965	PH-TB-15-35	2017-03-04 03:04:28	NO DIL	0.86	coal 86	-27.29	1.86	602.5	41.9865	-105.554	Leg 17 TB
G-5966	PH-TB-15-36	2017-03-04 01:06:09	NO DIL	2.153	coal 86	-26.7	0.79	607.5	41.9865	-105.554	Leg 17 TB
G-5967	PH-TB-15-37	2017-03-04 03:24:12	NO DIL	1.13	coal 86	-27.03	4.88	618.6	41.9864	-105.553	Leg 17 TB
G-5968	PH-TB-15-38	2017-03-04 03:14:20	NO DIL	1.372		-27.81	3.32	619.5	41.9864	-105.553	Leg 17 TB
G-5972	PH-TB-15-42	2017-03-04 02:05:19	NO DIL	1.716	coal 87	-27.41	3.21	665.5	41.9861	-105.553	Leg 17 TB
SIREAL Hanna Draw
OurLabID	Sample ID	Date_Time	Analysis	Amount weighed (mg)	NOTES	d13C (V-PDB)	Mass Fraction C (%)	Stratigraphic Level (m)	Latitude WGS 84	Longitude WGS 84	Section	Total Strat level_m
G-5678	15HB35	2016-06-17 00:02:44	X-277010	1.062		-26.37	3.539	8.5	41.9551	-106.543	Coal77	8.5
G-5679	15HB37	2016-06-16 23:33:01	X-277007	1.424		-26.57	1.102	67.5	41.9466	-106.542	Coal78	67.5
G-5680	15HB38	2016-06-17 01:31:54	X-277019	1.06		-25.41	1.267	23.5	41.9551	-106.543	Coal79	112
G-5681	15HB39	2016-06-17 01:51:43	X-277021	0.908		-26.21	3.17	17.5	41.9565	-106.538	Coal80-81	163.5
G-5682	15HB40	2016-06-17 01:02:11	X-277016	1.578		-26.35	1.97	38	41.9555	-106.532	Coal81-82	219
G-5673	15HB30	2016-06-17 02:31:21	X-277025	1.063		-25.52	2.384	11	41.9607	-106.53	Coal81	301
G-5674	15HB31	2016-06-17 02:51:10	X-277027	1.529		-26.06	1.587	44.5	41.9599	-106.53	Coal81	334.5
G-5675	15HB32	2016-06-17 01:12:05	X-277017	0.937		-26.03	1.314	66	41.9611	-106.53	Coal81	355
G-5676	15HB33	2016-06-16 18:21:29	X-276976	1.595		-25.2	9.377	97	41.9614	-106.529	Coal81	386
G-5676	15HB33	2016-06-16 18:41:18	X-276978	1.39		-25.13	9.405	97	41.9614	-106.529	Coal81	387
G-5676	15HB33	2016-06-17 02:41:16	X-277026	0.744		-25.08	10.54	97	41.9614	-106.529	Coal81	387
G-5677	15HB34	2016-06-16 14:03:53	X-276950	0.697		-26.39	20.71	200	41.9629	-106.526	Coal82	490
G-5677	15HB34	2016-06-17 03:30:48	X-277031	0.632		-26.51	23.12	200	41.9629	-106.526	Coal82	490
G-4530	14HB-BC-004	2015-02-20 15:15:29	Big Channel	1.589		-26.64	1.98	4.5	41.9672	-106.523	Coal82-83	527.5
G-4530	14HB-BC-004	2015-02-24 13:17:15	Big Channel	1.49		-26.54	2.456	4.5	41.9672	-106.523	Coal82-83	527.5
G-4531	14HB-BC-005	2015-02-20 17:14:22	Big Channel	0.945		-26.68	5.482	6	41.9672	-106.523	Coal82-83	529
G-4531	14HB-BC-005	2015-02-24 11:48:06	Big Channel	0.955		-26.62	6.235	6	41.9672	-106.523	Coal82-83	529
G-4532	14HB-BC-007	2015-02-24 12:57:27	Big Channel	1.526		-27.2	0.695	13	41.9672	-106.523	Coal82-83	536
G-4533	14HB-BC-008	2015-02-24 12:37:38	Big Channel	1.612		-23.51	0.373	20.5	41.9674	-106.523	Coal82-83	543.5
G-4534	14HB-BC-009	2015-02-24 12:47:32	Big Channel	1.471		-28.92	0.59	53	41.9678	-106.523	Coal82-83	576
G-4535	14HB-BC-010	2015-02-24 12:27:43	Big Channel	1.485		-25.19	0.398	73	41.9677	-106.522	Coal82-83	596
G-4536	14HB-BC-012	2015-02-24 13:07:21	Big Channel	0.784		-30.77	11.47	107	41.9681	-106.522	Coal82-83	630
G-4537	14HB-BC-013	2015-02-24 11:58:00	Big Channel	1.145		-29.51	2.003	112.5	41.9683	-106.522	Coal82-83	635.5
G-4538	14HB-BC-014	2015-02-24 11:38:11	Big Channel	0.365		-26.65	24.08	151	41.9686	-106.522	Coal82-83	674
G-4539	14HB-BC-015	2015-02-24 12:17:49	Big Channel	0.476		-25.55	17.99	159.5	41.9686	-106.522	Coal82-83	682.5
G-4540	14HB-BC-016	2015-02-24 12:07:54	Big Channel	0.97		-26.08	3.507	170	41.9688	-106.521	Coal82-83	693
G-5653	15HB01	2016-06-17 00:52:16	X-277015	0.922		-26.11	2.993	9	41.9727	-106.524	Coal83	699
G-5654	15HB02	2016-06-16 23:42:55	X-277008	1.008		-25.66	2.568	17	41.9728	-106.525	Coal83	707
G-5655	15HB04	2016-06-16 13:44:04	X-276948	0.678		-25.41	16.82	26	41.9721	-106.523	Coal84	716
G-5655	15HB04	2016-06-17 03:01:04	X-277028	0.703		-25.66	15.93	26	41.9721	-106.523	Coal84	716
G-5656	15HB05	2016-06-16 16:52:19	X-276967	0.727		-25.09	35.06	31.5	41.9721	-106.523	Coal84	722
G-5656	15HB05	2016-06-17 05:19:48	X-277042	0.669		-25.25	35.8	31.5	41.9721	-106.523	Coal84	722
G-5657	15HB06	2016-06-15 16:50:07	X-276846	0.706		-25.96	57.08	49	41.9719	-106.522	Coal84	739
G-5657	15HB06	2016-06-16 17:12:08	X-276969	0.788		-25.89	55.73	49	41.9719	-106.522	Coal84	739
G-5658	15HB07	2016-06-17 00:22:33	X-277012	0.964		-26.24	3.649	34.5	41.9811	-106.524	Coal84-85	807
G-5659	15HB08	2016-06-15 18:48:59	X-276858	0.522		-25.8	39.02	45	41.9813	-106.524	Coal84-85	817
G-5659	15HB08	2016-06-16 17:22:02	X-276970	1.04		-26.02	37.48	45	41.9813	-106.524	Coal84-85	817
G-5659	15HB08	2016-06-16 18:51:13	X-276979	1.035		-26.02	33.91	45	41.9813	-106.524	Coal84-85	817
G-5660	15HB09	2016-06-15 20:37:57	X-276869	0.664		-26.35	46.07	59.5	41.9813	-106.524	Coal84-85	831.5
G-5660	15HB09	2016-06-15 22:26:56	X-276880	0.423		-26.17	46.56	59.5	41.9813	-106.524	Coal84-85	831.5
G-5660	15HB09	2016-06-16 17:31:57	X-276971	1.023		-26.18	43.61	59.5	41.9813	-106.524	Coal84-85	831.5
G-5660	15HB09	2016-06-16 19:01:07	X-276980	0.966		-26.38	42.74	59.5	41.9813	-106.524	Coal84-85	831.5
G-5661	15HB10	2016-06-17 01:22:00	X-277018	0.965		-26.97	4.595	78	41.9815	-106.524	Coal84-85	850
G-5662	15HB11	2016-06-15 17:09:56	X-276848	0.692		-27.99	58.81	107	41.9818	-106.523	Coal84-85	879
G-5662	15HB11	2016-06-15 22:07:07	X-276878	0.445		-28.14	59.04	107	41.9818	-106.523	Coal84-85	879
G-5662	15HB11	2016-06-16 17:41:51	X-276972	0.951		-28.09	55.61	107	41.9818	-106.523	Coal84-85	879
G-5663	15HB12	2016-06-16 23:52:50	X-277009	1.526		-27.65	2.239	121.5	41.982	-106.523	Coal84-85	894
G-5664	15HB15	2016-06-15 17:29:44	X-276850	0.712		-26.96	15.76	60	41.985	-106.516	Coal86	984
G-5664	15HB15	2016-06-16 17:51:46	X-276973	1.506		-27.03		60	41.985	-106.516	Coal86	984
G-5664	15HB15	2016-06-16 18:31:24	X-276977	1.736		-27.23	13.74	60	41.985	-106.516	Coal86	984
G-5665	15HB17	2016-06-16 16:32:30	X-276965	0.703		-24.98	46.35	27.5	41.99	-106.52	Coal87	1019.5
G-5666	15HB20	2016-06-17 00:42:22	X-277014	0.73		-27.73	5.464	77.5	41.9912	-106.521	Coal87	1069.5
G-5667	15HB21	2016-06-15 18:29:11	X-276856	0.588		-26.01	32.81	11	41.9954	-106.516	Coal88	1101
G-5667	15HB21	2016-06-16 18:01:40	X-276974	1.065		-26.12	32.24	11	41.9954	-106.516	Coal88	1101
G-5667	15HB21	2016-06-16 19:11:02	X-276981	0.913		-26.01	31.47	11	41.9954	-106.516	Coal88	1101
G-5668	15HB22	2016-06-17 01:41:49	X-277020	1.079		-25.39	4.657	27	41.9957	-106.516	Coal88	1117
G-5669	15HB24	2016-06-16 14:23:42	X-276952	0.703		-27.11	18.66	30	42	-106.514	Coal88B	1170
G-5669	15HB24	2016-06-17 03:50:37	X-277033	0.541		-27.4	17.65	30	42	-106.514	Coal88B	1170
G-5670	15HB25	2016-06-17 00:32:27	X-277013	0.949		-28.49	3.669	6	42.0012	-106.504	Coal89	1192
G-5671	15HB26	2016-06-17 00:12:39	X-277011	0.957		-28.3	5.095	14	42.0012	-106.504	Coal89	1200
G-5672	15HB28	2016-06-15 20:57:46	X-276871	0.708		-26.2	18.43	11	42.0008	-106.498	Coal90	1220
G-5672	15HB28	2016-06-16 18:11:35	X-276975	0.95		-25.98	18.48	11	42.0008	-106.498	Coal90	1220
G-5672	15HB28	2016-06-16 19:20:58	X-276982	1.053		-26.05	17.35	11	42.0008	-106.498	Coal90	1220
USGS
Sample Name	Section	original meter	meter	d13CvPDB	d13CvPDB	RUN	Latitude WGS 84	Longitude WGS 84	UTMx (NAD 83)	UTMy (NAD 83)	Comment
BMV 12	Beer Mug Vista	12	12	-25.9225	-25.9225	NC1405A	42.0116	-106.454	379631	4.65209e+06
BMV127	Beer Mug Vista	127	127	-25.8544	-25.8544	NC1405A	42.0111	-106.457	379356	4.65204e+06
BMV 167	Beer Mug Vista	167	167	-25.9081	-25.9081	NC1405A	42.0104	-106.458	379277	4.65196e+06
BMV 167L	Beer Mug Vista	167	167	-25.8059	-25.8059	NC1405A	42.0099	-106.458	379286	4.65191e+06
BMV 185	Beer Mug Vista	185	185	-25.1065	-25.1065	NC1405A	42.0093	-106.458	379264	4.65183e+06
BMV 201	Beer Mug Vista	201	201	-25.2752	-25.2752	NC1405A	42.0089	-106.458	379267	4.65179e+06
BMV 212	Beer Mug Vista	212	212	-24.3426	-24.3426	NC1405A	42.009	-106.458	379245	4.6518e+06	pure coal
BMVL 212L	Beer Mug Vista	212	212	-25.2107	-25.2107	NC1405A	42.009	-106.458	379245	4.6518e+06
BMV 233	Beer Mug Vista	233	233	-26.7874	-26.7874	NC1405A	42.0088	-106.458	379231	4.65178e+06
BMV 6	Beer Mug Vista	252	252	-25.2632	-25.2632	NC1405A	42.0086	-106.461	379033	4.65177e+06	246 m in BMV lat + 6m
BMV 6 DUPLICATE	Beer Mug Vista	252	252	-25.243	-25.243	NC1405A	42.0086	-106.461	379033	4.65177e+06
BMVL 11.5L	Beer Mug Lateral	257	257	-25.9115	-25.9115	NC1405A	42.0086	-106.461	379018	4.65176e+06	246 m in BMV lat + 11m
BMVL 11.5D	Beer Mug Lateral	257	257	-25.963	-25.963	NC1405A	42.0086	-106.461	379018	4.65176e+06
16BC0	Big Channel 16	0	0	-26.7018	-26.7018	NC1405A	41.967	-106.523	373770	4.64724e+06
16BC 15	Big Channel 16	15	15	-26.4876	-26.4876	NC1405A	41.9672	-106.523	373779	4.64726e+06	l.green mudstone - poor sample
16BC50	Big Channel 16	50	50	-30.0378	-30.0378	NC1405A	41.9677	-106.523	373811	4.64731e+06	med brown - modern roots? (soily)
16BC 111	Big Channel 16	111	111	-26.3868	-26.3868	NC1405A	41.9684	-106.522	373866	4.64739e+06
16BC 113	Big Channel 16	113	113	-27.3903	-27.3903	NC1405A	41.9683	-106.522	373870	4.64738e+06
16BC 155	Big Channel 16	155	155	-27.5995	-27.5995	NC1405A	41.9685	-106.521	373931	4.6474e+06
16BC 17B	Big Channel 16	17	160	-30.4758	-30.4758	NC1405A	41.9688	-106.521	373941	4.64743e+06	foil oxidized! Choc brown - clayey (minor organics)
16L17 440	Leg 17	440	440	-25.8353	-25.8353	NC1405A	41.9861	-106.447	380136	4.64925e+06
16L17 469	Leg 17	469	469	-26.3525	-26.3525	NC1405A	41.9859	-106.447	380118	4649218
BCL 0	Big Channel Lateral	0	-10	-27.5394	-27.5394	NC1405A	41.9846	-106.557	371033	4.64924e+06
BCL 13	Big Channel Lateral	13	3	-27.0053	-27.0053	NC1405A	41.9849	-106.557	371042	4.64927e+06
BCL 44	Big Channel Lateral	44	34	-25.5971	-25.5971	NC1405A	41.9852	-106.556	371082	4.6493e+06
BCL 66	Big Channel Lateral	66	56	-27.6876	-27.6876	NC1405A	41.9853	-106.556	371126	4.64931e+06
BCL 82	Big Channel Lateral	82	72	-26.3283	-26.3283	NC1405A	41.9857	-106.556	371084	4649362
BCL 86B	Big Channel Lateral	86	76	-26.6615	-26.6615	NC1405A	41.9856	-106.556	371113	4.64935e+06
BCL 86B DUPLICATE	Big Channel Lateral	86	76	-26.7417	-26.7417	NC1405A	41.9856	-106.556	371113	4.64935e+06
BCL 86	Big Channel Lateral	86	76	-26.2686	-26.2686	NC1405A	41.9857	-106.556	371085	4.64936e+06
BCL 102	Big Channel Lateral	102	92	-27.7433	-27.7433	NC1405A	41.9856	-106.553	371333	4.64934e+06	green clay
BCL 182	Big Channel Lateral	182	172	-26.9057	-26.9057	NC1405A	41.9861	-106.552	371464	4.6494e+06
